# Supplementary material
Source: Springer Nature journal article supplement (https://www.springermedizin.de/resource/supplementary/12960_2010_260_MOESM1_ESM.pdf/9570760)
Supplement: MOESM1 [file 9570760]

Rural and remote areas

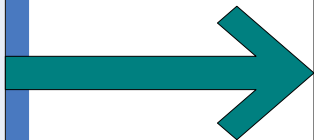

Urban centres

Lower level facilities (commune and district)

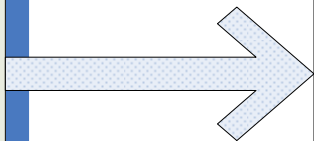

Higher level facilities (regional and national)

Public sector

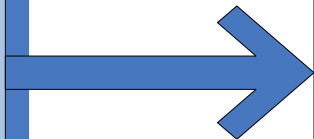

Private sector

Preventive health

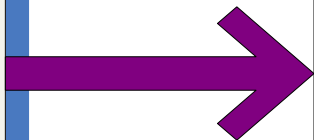

Curative health
